# Supplementary material for: Using telemedicine and wearable technology to establish a virtual clinic for people with Parkinson’s disease
Source: PubMed Central journal article supplement — BMJ Open Qual. 2020 Sep 21;9(3):e001000. doi: 10.1136/bmjoq-2020-001000 (PMC7507852; doi:10.1136/bmjoq-2020-001000), 2020-09-21
Supplement: bmjoq-2020-001000supp001.pdf [file bmjoq-2020-001000supp001.pdf]

### Phone Clinic Satisfaction Questionnaire

Date of clinic: \_\_\_\_\_

|                                                                              |                   |          |                           |       |                |                       |
|------------------------------------------------------------------------------|-------------------|----------|---------------------------|-------|----------------|-----------------------|
| The doctor listened to me                                                    | Strongly disagree | Disagree | Neither agree or disagree | Agree | Strongly Agree | <i>Not applicable</i> |
| My concerns were addressed                                                   | Strongly disagree | Disagree | Neither agree or disagree | Agree | Strongly Agree | <i>Not applicable</i> |
| I was able to talk to the doctor as I would in my normal clinic appointments | Strongly disagree | Disagree | Neither agree or disagree | Agree | Strongly Agree | <i>Not applicable</i> |
| I would recommend phone clinic to other patients                             | Strongly disagree | Disagree | Neither agree or disagree | Agree | Strongly Agree | <i>Not applicable</i> |
| I would consider phone clinics useful for other health conditions            | Strongly disagree | Disagree | Neither agree or disagree | Agree | Strongly Agree | <i>Not applicable</i> |
| Overall, I am satisfied with the phone clinic                                | Strongly disagree | Disagree | Neither agree or disagree | Agree | Strongly Agree | <i>Not applicable</i> |

Any other comments:

---



---



---



---



---



---



---

Thank you for your feedback
