# Supplementary figures and images for: Using telemedicine and wearable technology to establish a virtual clinic for people with Parkinson’s disease
Source: PubMed Central journal article supplement — BMJ Open Qual. 2020 Sep 21;9(3):e001000. doi: 10.1136/bmjoq-2020-001000 (PMC7507852; doi:10.1136/bmjoq-2020-001000), 2020-09-21

**Appendix 3 - Statistical variation charts**

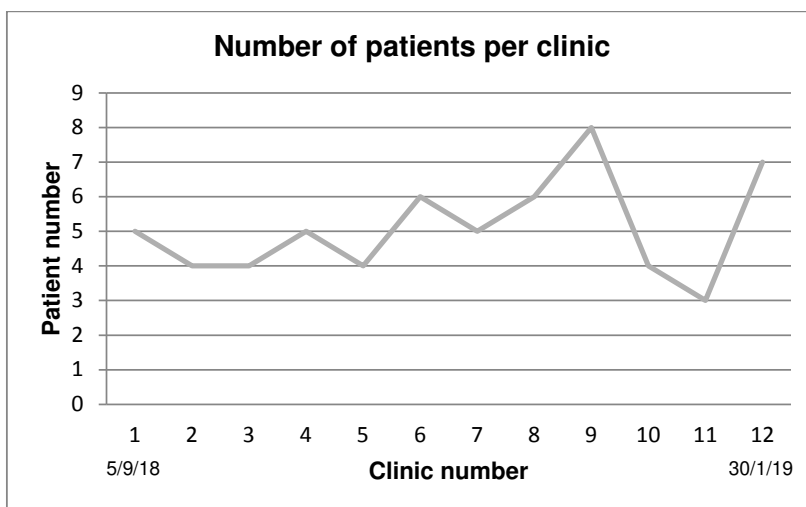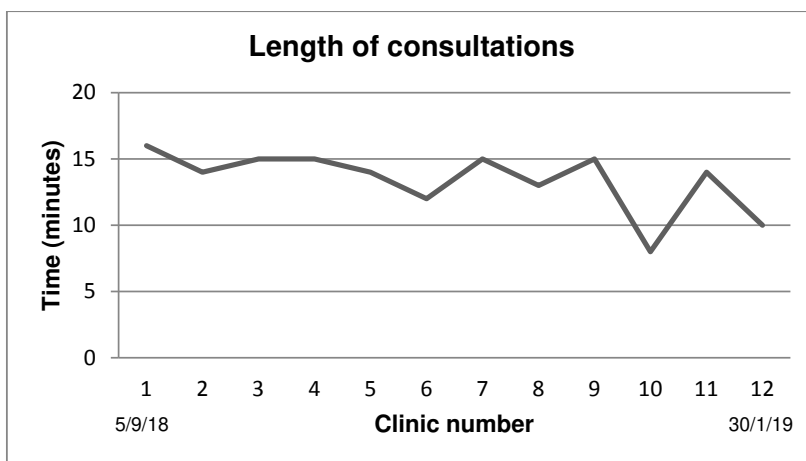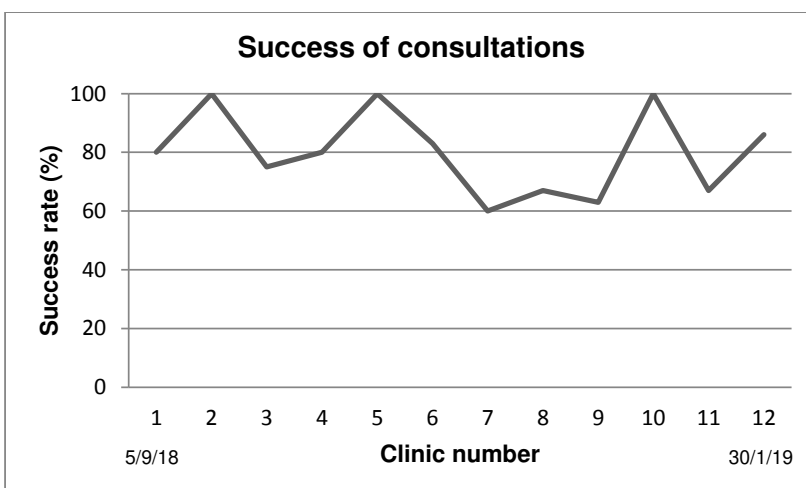

Supplement: bmjoq-2020-001000supp003.pdf [file bmjoq-2020-001000supp003.pdf]
